# Supplementary material for: Strengthening the relationship between community resilience and health emergency communications: Systematic review and model development
Source: Research Square preprint supplement (doi:10.21203/rs.3.rs-4527358/v1), 2024-06-25
Supplement: Supplementary file 2 [file 87778583d3b56aa3a06cbf6f.docx]

## Table 2: Overview of themes and subthemes in the literature

| *Theme 1: The relationship between emergency communication and community resilience* | No. of references |
| --- | --- |
| Building trust and collaboration within communities | 22 |
| Identifying resources and their distribution | 14 |
| Tailoring communication strategies | 12 |
| Considering inclusion and equity | 8 |
| Community engagement and feedback | 8 |
|  | |
| *Theme 2: Strategies and interventions to enhance community resilience and health emergency communication (illustrated by 16 case studies)* |  |
| Facilitating community structures as channels for communication | 9 |
| Respecting personal and private boundaries in health communication | 6 |
| Targeting outreach for effective crisis communication | 4 |
| Building resilience through communication initiatives | 3 |
| Demonstrating commitment to equity and inclusion in communications | 3 |

Note The total number of references exceeds 86 as some articles addressed more than one theme.
